# Supplementary material for: Absolute Quantification of the Central Carbon Metabolome in Eight Commonly Applied Prokaryotic and Eukaryotic Model Systems
Source: MDPI journal article supplement (doi:10.3390/metabo10020074), 2020-02-19
Supplement: s1 [file s1]

**Table S6 Transitions of derivatized amino acids:** Retention time, collision potential, and precursor-product ion transition of U<sup>12</sup>C and U<sup>13</sup>C<sup>15</sup>N isotopologues. Metabolite abbreviations are listed in Table S1.

| Metabolite | Rentention<br>time (min) | Collision (V) | <sup>12</sup> C |       | U <sup>13</sup> C, <sup>15</sup> N |       |
|------------|--------------------------|---------------|-----------------|-------|------------------------------------|-------|
|            |                          |               | Q1              | Q3    | Q1                                 | Q3    |
| Ala        | 4,1                      | 14            | 225,0           | 44,0  | 228,9                              | 94,2  |
| Arg        | 2,8                      | 14            | 310,1           | 217,1 | 320,1                              | 227,1 |
| Asn        | 3,0                      | 16            | 268,0           | 87,1  | 272,2                              | 90,1  |
| Asp        | 3,7                      | 14            | 269,0           | 116,0 | 274,0                              | 139,3 |
| Cys        | 4,5                      | 8             | 257,0           | 122,0 | 261,0                              | 126,0 |
| Gln        | 3,1                      | 16            | 282,1           | 129,8 | 287,1                              | 194,1 |
| Glu        | 3,7                      | 16            | 283,0           | 130,0 | 289,0                              | 136,0 |
| Gly        | 3,3                      | 10            | 211,0           | 75,9  | 214,0                              | 78,9  |
| His        | 2,4                      | 22            | 291,1           | 110,1 | 300,1                              | 118,0 |
| Ile        | 5,1                      | 28            | 267,3           | 69,0  | 274,3                              | 74,0  |
| Leu        | 5,1                      | 38            | 267,1           | 43,3  | 274,1                              | 46,0  |
| Lys        | 5,1                      | 12            | 417,1           | 324,1 | 425,1                              | 332,1 |
| Met        | 4,8                      | 18            | 285,1           | 104,0 | 291,1                              | 108,0 |
| Phe        | 5,1                      | 26            | 301,1           | 136,0 | 311,1                              | 136,0 |
| Pro        | 4,1                      | 24            | 251,0           | 136,0 | 257,0                              | 136,0 |
| Ser        | 3,2                      | 16            | 241,1           | 60,0  | 245,1                              | 63,0  |
| Thr        | 4,0                      | 18            | 255,0           | 74,0  | 259,0                              | 77,0  |
| Trp        | 5,0                      | 28            | 340,1           | 146,0 | - *                                | - *   |
| Tyr        | 4,5                      | 26            | 317,1           | 123,0 | 327,1                              | 147,2 |
| Val        | 4,8                      | 18            | 253,0           | 136,0 | 259,0                              | 136,0 |

\*U<sup>13</sup>C, <sup>15</sup>N Phe transition applied for correction
