# Supplementary material for: Absolute Quantification of the Central Carbon Metabolome in Eight Commonly Applied Prokaryotic and Eukaryotic Model Systems
Source: MDPI journal article supplement (doi:10.3390/metabo10020074), 2020-02-19
Supplement: s1 [file s1]

**Table S3 Contribution of metabolite classes:** Total intracellular concentrations (M) and contribution (%) to total listed for each metabolite class and the total of all classes. TCA; tricarboxylic acid, PPP; pentose phosphate pathway.

| Organism/<br>cell line           | Culture<br>medium | Total intracellular<br>concentration (M)/<br>percentage (%) | Metabolite class |         |                           |         |           |                          |                               |             | Total   |
|----------------------------------|-------------------|-------------------------------------------------------------|------------------|---------|---------------------------|---------|-----------|--------------------------|-------------------------------|-------------|---------|
|                                  |                   |                                                             | Glycolysis       | PPP     | Other sugar<br>phosphates | Lactate | TCA cycle | Nucleoside<br>phosphates | Deoxynucleoside<br>phosphates | Amino acids |         |
| <i>Bacillus subtilis</i>         | Mineral           | M                                                           | 9.9E-04          | 3.0E-04 | 4.1E-04                   | 5.2E-04 | 3.6E-04   | 1.9E-03                  | 1.4E-04                       | 2.7E-03     | 7.3E-03 |
|                                  |                   | %                                                           | 13.6             | 4.0     | 5.6                       | 7.1     | 4.9       | 26.6                     | 1.9                           | 36.4        | 100     |
|                                  | Rich              | M                                                           | 1.3E-03          | 8.8E-05 | 2.7E-04                   | 2.6E-04 | 1.1E-04   | 1.9E-03                  | 1.5E-04                       | 2.4E-03     | 6.5E-03 |
|                                  |                   | %                                                           | 19.5             | 1.4     | 4.1                       | 4.1     | 1.7       | 29.7                     | 2.3                           | 37.2        | 100     |
| <i>Saccharomyces cerevisiae</i>  | Mineral           | M                                                           | 6.2E-03          | 2.3E-04 | 1.1E-03                   | 6.7E-04 | 2.5E-03   | 3.9E-03                  | 9.1E-05                       | 1.7E-01     | 1.8E-01 |
|                                  |                   | %                                                           | 3.4              | 0.1     | 0.6                       | 0.4     | 1.4       | 2.2                      | 0.1                           | 91.9        | 100     |
|                                  | Rich              | M                                                           | 7.0E-03          | 7.3E-04 | 1.1E-03                   | 1.1E-03 | 1.8E-03   | 4.6E-03                  | 8.9E-05                       | 1.5E-01     | 1.7E-01 |
|                                  |                   | %                                                           | 4.1              | 0.4     | 0.6                       | 0.6     | 1.1       | 2.7                      | 0.1                           | 90.3        | 100     |
| <i>Nannochloropsis oceanica</i>  | Mineral           | M                                                           | 2.6E-03          | 3.9E-04 | 7.6E-04                   | 2.3E-03 | 1.0E-02   | 2.9E-03                  | 1.7E-05                       | 2.4E-01     | 2.6E-01 |
|                                  |                   | %                                                           | 1.0              | 0.2     | 0.3                       | 0.9     | 3.9       | 1.1                      | 0.0                           | 92.6        | 100     |
| <i>Phaeodactylum tricornutum</i> | Mineral           | M                                                           | 1.1E-03          | 6.7E-04 | 3.8E-04                   | 1.0E-03 | 1.6E-02   | 1.2E-03                  | 4.7E-06                       | 5.7E-02     | 7.7E-02 |
|                                  |                   | %                                                           | 1.4              | 0.9     | 0.5                       | 1.3     | 20.2      | 1.6                      | 0.0                           | 74.1        | 100     |
| Hek293                           | Rich              | M                                                           | 9.1E-04          | 5.9E-05 | 1.4E-03                   | 3.6E-02 | 2.4E-03   | 5.5E-03                  | 5.7E-05                       | 1.8E-01     | 2.2E-01 |
|                                  |                   | %                                                           | 0.4              | 0.0     | 0.6                       | 15.9    | 1.1       | 2.5                      | 0.0                           | 79.5        | 100     |
| HeLa S3                          | Rich              | M                                                           | 1.8E-03          | 2.2E-04 | 2.6E-03                   | 3.3E-02 | 3.0E-03   | 5.3E-03                  | 5.4E-05                       | 1.9E-01     | 2.3E-01 |
|                                  |                   | %                                                           | 0.8              | 0.1     | 1.1                       | 14.3    | 1.3       | 2.3                      | 0.0                           | 80.1        | 100     |
| NB4                              | Rich              | M                                                           | 4.7E-04          | 3.3E-05 | 5.6E-04                   | 1.6E-02 | 1.7E-03   | 2.1E-03                  | 3.4E-05                       | 3.0E-02     | 5.0E-02 |
|                                  |                   | %                                                           | 0.9              | 0.1     | 1.1                       | 31.3    | 3.5       | 4.2                      | 0.1                           | 58.8        | 100     |
| MC/CAR                           | Rich              | M                                                           | 2.6E-03          | 1.7E-05 | 3.4E-04                   | 2.0E-02 | 2.7E-03   | 3.3E-03                  | 3.6E-05                       | 8.8E-02     | 1.2E-01 |
|                                  |                   | %                                                           | 2.2              | 0.0     | 0.3                       | 17.4    | 2.3       | 2.8                      | 0.0                           | 74.9        | 100     |
