# Supplementary material for: Absolute Quantification of the Central Carbon Metabolome in Eight Commonly Applied Prokaryotic and Eukaryotic Model Systems
Source: MDPI journal article supplement (doi:10.3390/metabo10020074), 2020-02-19
Supplement: s1 [file s1]

**Table S2 Intracellular concentrations:** Intracellular concentrations (M) of all metabolites included in the panel for metabolite profiling, listed for all biological replicates. LOD; Limit of detection, LOQ; limit of quantification. Metabolite abbreviations are listed in Table S1.

| Organism/<br>cell line   | Culture<br>medium | Replica                   | Intracellular concentration (M) |          |          |          |          |          |          |          |          |          |          |          |          |          |          |          |          |          |          |          |          |          |          |          |
|--------------------------|-------------------|---------------------------|---------------------------------|----------|----------|----------|----------|----------|----------|----------|----------|----------|----------|----------|----------|----------|----------|----------|----------|----------|----------|----------|----------|----------|----------|----------|
|                          |                   |                           | 2-3PG                           | 6PG      | ADP      | aKG      | Ala      | AMP      | Arg      | Asn      | Asp      | ATP      | CDP      | Cit      | CMP      | CTP      | Cys      | dADP     | dAMP     | dATP     | dCTP     | dGTP     | dTDP     | dTMP     |          |          |
| Bacillus subtilis        | Mineral           | 1                         | 4.15E-04                        | 6.52E-05 | 3.59E-04 | 1.50E-04 | 1.31E-04 | 1.90E-04 | 1.52E-05 | 3.51E-06 | 7.73E-05 | 5.18E-04 | 2.24E-05 | 3.01E-04 | 3.98E-05 | 5.57E-05 | <LOQ     | 4.18E-05 | 2.46E-06 | 2.69E-05 | 1.60E-05 | 7.73E-06 | 1.59E-05 | 5.97E-06 |          |          |
|                          |                   | 2                         | 3.81E-04                        | 5.49E-05 | 3.85E-04 | 8.73E-05 | 9.81E-05 | 1.37E-04 | 1.35E-05 | 1.23E-06 | 9.01E-05 | 7.10E-04 | 2.69E-05 | 1.56E-04 | 4.80E-05 | 8.81E-05 | <LOQ     | 3.91E-05 | 1.72E-06 | 3.18E-05 | 1.28E-05 | 7.67E-06 | 1.14E-05 | 5.34E-06 |          |          |
|                          |                   | 3                         | 3.36E-04                        | 5.03E-05 | 3.24E-04 | 8.27E-05 | 6.86E-05 | 8.40E-05 | 7.84E-06 | 0.00E+00 | 5.68E-05 | 7.07E-04 | 2.64E-05 | 1.32E-04 | 2.72E-05 | 8.74E-05 | <LOQ     | 3.84E-05 | 1.08E-06 | 3.25E-05 | 1.60E-05 | 1.03E-05 | 1.01E-05 | 3.92E-06 |          |          |
|                          |                   | 4                         | 2.17E-04                        | 1.66E-05 | 3.75E-04 | 9.81E-05 | 1.15E-04 | 2.73E-04 | 4.36E-05 | 6.02E-06 | 1.72E-04 | 5.58E-04 | 3.23E-05 | 1.27E-04 | 4.21E-05 | 8.50E-05 | <LOQ     | 4.76E-05 | 2.78E-06 | 3.00E-05 | 1.40E-05 | 1.04E-05 | 1.59E-05 | 4.51E-06 |          |          |
|                          | Rich              | 1                         | 2.19E-04                        | 2.21E-05 | 2.80E-04 | 2.93E-05 | 2.64E-04 | 8.99E-05 | 1.37E-04 | 4.34E-06 | 1.51E-04 | 5.99E-04 | 1.37E-05 | 5.50E-05 | 1.98E-05 | 4.00E-05 | <LOQ     | 5.27E-05 | 1.35E-06 | 4.35E-05 | 1.10E-05 | 1.36E-05 | 6.12E-06 | 1.90E-06 |          |          |
|                          |                   | 2                         | 2.98E-04                        | 5.93E-06 | 4.32E-04 | 1.97E-05 | 2.45E-04 | 1.98E-04 | 9.78E-05 | 4.27E-06 | 1.18E-04 | 6.68E-04 | 1.43E-05 | 2.89E-05 | 1.75E-05 | 1.75E-05 | <LOQ     | 7.74E-05 | 5.77E-06 | 4.29E-05 | 3.74E-06 | 9.46E-06 | 5.77E-06 | 3.95E-06 |          |          |
|                          |                   | 3                         | 1.75E-04                        | 8.71E-06 | 3.87E-04 | 2.38E-05 | 3.17E-04 | 1.33E-04 | 1.32E-04 | 5.37E-06 | 1.56E-04 | 7.71E-04 | 7.85E-06 | 3.82E-05 | 1.08E-05 | 9.94E-06 | <LOQ     | 6.49E-05 | 3.49E-06 | 4.82E-05 | 3.65E-06 | 8.12E-06 | 3.87E-06 | 2.26E-06 |          |          |
|                          |                   | 4                         | 2.20E-04                        | 1.06E-05 | 3.29E-04 | 1.20E-05 | 1.31E-04 | 9.55E-05 | 7.31E-05 | 1.94E-06 | 6.10E-05 | 7.88E-04 | 7.35E-06 | 2.25E-05 | 9.34E-06 | 1.20E-05 | <LOQ     | 6.82E-05 | 2.76E-06 | 5.51E-05 | 3.82E-06 | 1.14E-05 | 3.05E-06 | 2.23E-06 |          |          |
| Saccharomyces cerevisiae | Mineral           | 1                         | 5.15E-04                        | 1.73E-04 | 6.08E-04 | 9.83E-05 | 6.74E-03 | 1.60E-04 | 1.00E-02 | 9.65E-04 | 1.06E-02 | 1.34E-03 | 4.68E-05 | 5.65E-04 | 7.56E-06 | 2.39E-04 | <LOQ     | 1.66E-05 | 2.77E-07 | 1.82E-05 | 6.82E-06 | 6.64E-06 | 4.06E-06 | 1.11E-06 |          |          |
|                          |                   | 2                         | 8.61E-04                        | 2.72E-04 | 9.21E-04 | 1.43E-04 | 9.95E-03 | 2.54E-04 | 1.47E-02 | 1.50E-03 | 1.51E-02 | 1.91E-03 | 8.48E-05 | 9.09E-04 | 1.51E-05 | 3.54E-04 | <LOQ     | 2.46E-05 | 4.92E-07 | 2.48E-05 | 8.98E-06 | 8.98E-06 | 7.01E-06 | 1.60E-06 |          |          |
|                          |                   | 3                         | 9.23E-04                        | 2.68E-04 | 1.01E-03 | 1.29E-04 | 9.55E-03 | 2.38E-04 | 1.14E-02 | 1.23E-03 | 1.26E-02 | 2.22E-03 | 1.05E-04 | 7.47E-04 | 1.76E-05 | 3.99E-04 | <LOQ     | 2.81E-05 | 5.53E-07 | 2.82E-05 | 1.21E-05 | 1.11E-05 | 9.07E-06 | 1.55E-06 |          |          |
|                          |                   | 4                         | 6.66E-04                        | 1.73E-04 | 7.48E-04 | 1.26E-04 | 1.05E-02 | 2.06E-04 | 1.12E-02 | 1.17E-03 | 1.10E-02 | 1.69E-03 | 5.79E-05 | 6.22E-04 | 9.71E-06 | 3.07E-04 | <LOQ     | 1.84E-05 | 4.92E-07 | 2.15E-05 | 8.48E-06 | 6.89E-06 | 4.67E-06 | 1.35E-06 |          |          |
|                          | Rich              | 5                         | 6.14E-04                        | 1.51E-04 | 9.15E-04 | 9.06E-05 | 9.94E-03 | 2.55E-04 | 1.47E-02 | 1.39E-03 | 1.36E-02 | 1.81E-03 | 7.79E-05 | 9.91E-04 | 1.52E-05 | 3.25E-04 | <LOQ     | 2.46E-05 | 4.43E-07 | 2.39E-05 | 9.41E-06 | 8.52E-06 | 7.97E-06 | 1.44E-06 |          |          |
|                          |                   | 1                         | 7.16E-04                        | 7.28E-05 | 6.40E-04 | 6.67E-04 | 1.10E-02 | 2.47E-04 | 1.04E-02 | 2.10E-03 | 2.41E-02 | 1.27E-03 | 6.76E-05 | 7.96E-04 | 2.42E-05 | 2.82E-04 | <LOQ     | 2.39E-05 | 8.30E-07 | 2.30E-05 | 9.04E-06 | 8.11E-06 | 8.39E-06 | 1.48E-06 |          |          |
|                          |                   | 2                         | 6.13E-04                        | 6.98E-05 | 6.06E-04 | 5.11E-04 | 8.44E-03 | 2.81E-04 | 9.05E-03 | 1.44E-03 | 2.24E-02 | 1.03E-03 | 8.20E-05 | 7.03E-04 | 2.14E-05 | 2.21E-04 | <LOQ     | 2.36E-05 | 1.03E-06 | 1.98E-05 | 7.43E-06 | 7.19E-06 | 9.01E-06 | 1.34E-06 |          |          |
|                          |                   | 3                         | 7.40E-04                        | 7.79E-05 | 6.87E-04 | 7.62E-04 | 8.51E-03 | 2.21E-04 | 1.05E-02 | 1.53E-03 | 2.43E-02 | 1.22E-03 | 7.97E-05 | 8.48E-04 | 1.63E-05 | 2.69E-04 | <LOQ     | 2.75E-05 | 9.36E-07 | 2.27E-05 | 8.51E-06 | 8.00E-06 | 9.02E-06 | 1.53E-06 |          |          |
| Nannochloropsis oceanica | Mineral           | 4                         | 7.20E-04                        | 8.19E-05 | 6.96E-04 | 6.59E-04 | 1.02E-02 | 2.67E-04 | 1.09E-02 | 1.92E-03 | 2.53E-02 | 1.21E-03 | 8.73E-05 | 7.53E-04 | 2.69E-05 | 2.64E-04 | <LOQ     | 2.78E-05 | 1.20E-06 | 2.23E-05 | 8.11E-06 | 8.30E-06 | 1.10E-05 | 1.66E-06 |          |          |
|                          |                   | 1                         | 8.10E-04                        | 8.73E-06 | 4.02E-04 | 1.04E-03 | 3.91E-03 | 3.41E-04 | 3.78E-04 | 5.72E-04 | 6.83E-03 | 1.13E-03 | 1.84E-05 | 8.69E-03 | 2.13E-05 | 4.17E-05 | <LOQ     | 4.85E-06 | <LOQ     | 6.79E-06 | 1.94E-06 | <LOQ     | 3.88E-06 | 3.88E-06 |          |          |
|                          |                   | 2                         | 8.98E-04                        | 2.32E-05 | 6.05E-04 | 9.93E-04 | 5.51E-03 | 1.65E-04 | 6.36E-04 | 1.00E-03 | 8.40E-03 | 1.78E-03 | 1.76E-05 | 1.25E-02 | 1.30E-05 | 7.66E-05 | <LOQ     | 3.25E-06 | <LOQ     | 5.11E-06 | 1.86E-06 | <LOQ     | 1.86E-06 | 2.32E-06 |          |          |
|                          |                   | 3                         | 5.48E-04                        | 2.48E-06 | 4.75E-04 | 6.04E-04 | 3.35E-03 | 2.56E-04 | 4.34E-04 | 5.83E-04 | 4.96E-03 | 8.75E-04 | 2.11E-05 | 4.81E-03 | 2.11E-05 | 2.23E-05 | <LOQ     | 2.48E-06 | <LOQ     | 4.96E-06 | 1.24E-06 | <LOQ     | 2.48E-06 | 4.96E-06 |          |          |
|                          | Rich              | 4                         | 1.29E-03                        | 2.89E-05 | 6.24E-04 | 6.44E-04 | 3.06E-03 | 1.51E-04 | 3.80E-04 | 5.83E-04 | 5.47E-03 | 1.87E-03 | 1.87E-05 | 1.08E-02 | 2.03E-05 | 7.76E-05 | <LOQ     | 4.28E-06 | <LOQ     | 5.89E-06 | 2.14E-06 | <LOQ     | 1.61E-06 | 3.21E-06 |          |          |
|                          |                   | 5                         | 8.53E-04                        | 1.51E-05 | 4.58E-04 | 6.36E-04 | 3.67E-03 | 3.86E-04 | 5.12E-04 | 7.71E-04 | 6.28E-03 | 1.15E-03 | 2.45E-05 | 7.16E-03 | 2.02E-05 | 4.54E-05 | <LOQ     | 2.88E-06 | <LOQ     | 5.04E-06 | 1.44E-06 | <LOQ     | 2.16E-06 | 2.16E-06 |          |          |
|                          |                   | Phaeodactylum tricornutum | Mineral                         | 1        | 2.10E-04 | 4.77E-06 | 3.28E-04 | 1.12E-04 | 2.78E-03 | 1.70E-04 | 1.93E-03 | 7.83E-03 | 3.70E-03 | 4.14E-04 | 2.86E-05 | 4.01E-03 | 6.50E-06 | 1.58E-05 | <LOQ     | 2.38E-06 | <LOD     | <LOD     | 2.60E-06 | <LOD     | 3.03E-06 | 2.82E-06 |
|                          |                   |                           |                                 | 2        | 2.13E-04 | 4.23E-06 | 2.07E-04 | 1.14E-04 | 2.54E-03 | 6.17E-05 | 1.65E-03 | 5.85E-03 | 2.69E-03 | 5.98E-04 | 9.47E-06 | 4.28E-03 | 4.23E-06 | 2.94E-05 | <LOQ     | 6.05E-07 | <LOD     | <LOD     | 1.01E-06 | <LOD     | 8.06E-07 | 1.41E-06 |
| 3                        | 3.08E-04          |                           |                                 | 8.70E-06 | 2.40E-04 | 8.91E-03 | 2.78E-04 | 7.46E-05 | 4.89E-04 | 7.89E-04 | 4.60E-04 | 6.30E-04 | 8.31E-06 | 1.29E-02 | 4.45E-06 | 3.73E-05 | <LOQ     | 7.73E-07 | <LOD     | <LOD     | NA       | <LOD     | 3.87E-07 | 5.80E-07 |          |          |
| 4                        | 2.29E-04          |                           |                                 | 7.00E-06 | 2.32E-04 | 1.07E-02 | 2.38E-04 | 1.59E-04 | 2.48E-04 | 5.41E-04 | 4.48E-04 | 4.65E-04 | 1.63E-05 | 1.07E-02 | 8.07E-06 | 1.21E-05 | <LOQ     | 6.37E-07 | <LOD     | <LOD     | 4.25E-07 | <LOD     | 4.25E-07 | 1.49E-06 |          |          |
| Hek293                   | Mineral           | 5                         | 3.01E-04                        | 9.15E-06 | 2.46E-04 | 1.12E-02 | 2.66E-04 | 1.99E-04 | 2.82E-04 | 8.57E-04 | 5.21E-04 | 4.99E-04 | 1.77E-05 | 1.05E-02 | 1.05E-05 | 1.35E-05 | <LOQ     | 5.96E-07 | <LOD     | <LOD     | 3.98E-07 | <LOD     | 5.96E-07 | 1.59E-06 |          |          |
|                          |                   | Rich                      | 1                               | 9.15E-05 | 1.39E-05 | 8.25E-04 | 2.23E-04 | 3.94E-03 | 1.78E-04 | 1.21E-03 | 1.70E-04 | 1.84E-03 | 2.40E-03 | 9.02E-05 | 7.94E-04 | 1.22E-05 | 2.96E-04 | <LOQ     | 1.29E-05 | 1.72E-07 | 1.32E-05 | 6.28E-06 | 3.27E-06 | 6.28E-06 | 1.03E-06 |          |
|                          |                   |                           | 2                               | 7.58E-05 | 1.27E-05 | 8.39E-04 | 9.28E-04 | 3.48E-03 | 1.60E-04 | 9.56E-04 | 1.40E-04 | 1.63E-03 | 2.45E-03 | 9.02E-05 | 6.61E-04 | 1.27E-05 | 3.02E-04 | <LOQ     | 1.32E-05 | 1.72E-07 | 1.40E-05 | 6.37E-06 | 3.36E-06 | 5.94E-06 | 9.47E-07 |          |
|                          |                   |                           | 3                               | 7.24E-05 | 1.31E-05 | 7.75E-04 | 8.36E-04 | 2.87E-03 | 1.36E-04 | 8.45E-04 | 1.16E-04 | 1.43E-03 | 2.49E-03 | 8.03E-05 | 6.10E-04 | 1.02E-05 | 3.25E-04 | <LOQ     | 1.22E-05 | 1.72E-07 | 1.39E-05 | 6.45E-06 | 3.61E-06 | 5.77E-06 | 9.47E-07 |          |
|                          | 4                 |                           | 7.87E-05                        | 1.27E-05 | 7.99E-04 | 7.84E-04 | 2.89E-03 | 1.37E-04 | 9.17E-04 | 1.18E-04 | 1.39E-03 | 2.48E-03 | 8.00E-05 | 5.69E-04 | 1.08E-05 | 3.19E-04 | <LOQ     | 1.21E-05 | 1.72E-07 | 1.27E-05 | 6.63E-06 | 3.53E-06 | 7.40E-06 | 9.47E-07 |          |          |
|                          | HeLa S3           | Rich                      | 1                               | 4.40E-05 | 7.17E-05 | 6.61E-04 | 8.73E-05 | 4.68E-03 | 1.23E-04 | 1.33E-03 | 1.51E-04 | 2.00E-02 | 1.97E-03 | 4.94E-05 | 1.04E-03 | 6.05E-06 | 2.73E-04 | <LOQ     | 1.01E-05 | 1.34E-07 | 1.18E-05 | 5.72E-06 | 3.16E-06 | 4.57E-06 | 1.08E-06 |          |
|                          |                   |                           | 2                               | 5.82E-05 | 7.89E-05 | 6.75E-04 | 7.67E-05 | 4.20E-03 | 1.30E-04 | 1.23E-03 | 1.47E-04 | 1.68E-02 | 2.14E-03 | 5.14E-05 | 9.80E-04 | 5.85E-06 | 2.85E-04 | <LOQ     | 9.82E-06 | 2.02E-07 | 1.21E-05 | 6.19E-06 | 3.50E-06 | 4.37E-06 | 1.14E-06 |          |
|                          |                   |                           | 3                               | 9.21E-05 | 1.13E-04 | 9.23E-04 | 1.38E-04 | 5.23E-03 | 1.76E-04 | 1.36E-03 | 1.86E-04 | 2.67E-02 | 2.54E-03 | 9.07E-05 | 1.33E-03 | 1.87E-05 | 4.00E-04 | <LOQ     | 1.57E-05 | 3.36E-07 | 1.67E-05 | 8.00E-06 | 4.91E-06 | 8.34E-06 | 1.08E-06 |          |
| 4                        |                   |                           | 5.10E-05                        | 6.29E-05 | 7.16E-04 | 7.11E-05 | 4.67E-03 | 1.27E-04 | 1.22E-03 | 1.50E-04 | 1.97E-02 | 2.01E-03 | 5.18E-05 | 1.04E-03 | 5.65E-06 | 2.75E-04 | <LOQ     | 1.03E-05 | 1.34E-07 | 1.17E-05 | 6.05E-06 | 2.96E-06 | 4.77E-06 | 1.01E-06 |          |          |
| NB4                      | Mineral           | 5                         | 7.28E-05                        | 9.68E-05 | 7.78E-04 | 1.03E-04 | 4.08E-03 | 1.45E-04 | 1.49E-03 | 1.51E-04 | 1.68E-02 | 2.46E-03 | 5.96E-05 | 1.08E-03 | 7.06E-06 | 3.39E-04 | <LOQ     | 1.22E-05 | 1.34E-07 | 1.40E-05 | 7.26E-06 | 3.70E-06 | 6.19E-06 | 1.21E-06 |          |          |
|                          |                   | Rich                      | 1                               |          |          |          |          |          |          |          |          |          |          |          |          |          |          |          |          |          |          |          |          |          |          |          |

Table S2 Intracellular concentrations: Continued

| Organism/<br>cell line       | Culture<br>medium | Replica  | Intracellular concentration (M) |          |          |          |          |          |          |          |          |          |          |          |          |          |          |          |          |          |          |          |          |          |
|------------------------------|-------------------|----------|---------------------------------|----------|----------|----------|----------|----------|----------|----------|----------|----------|----------|----------|----------|----------|----------|----------|----------|----------|----------|----------|----------|----------|
|                              |                   |          | dTTP                            | dUMP     | F1,6BP   | F1P      | F6P      | Fum      | G-/M1P   | G6P      | GAL1P    | GAL6P    | GDP      | GL3P     | Gln      | Glu      | Gly      | GMP      | GTP      | His      | Icit     | Ile      | Lac      | Leu      |
| Bacillus subtilis            | Mineral           | 1        | 2.20E-05                        | 7.02E-07 | 1.96E-04 | 4.10E-06 | 1.46E-04 | 4.80E-06 | 1.79E-05 | 1.51E-04 | 7.38E-06 | 1.17E-06 | 1.18E-04 | 2.93E-05 | 2.46E-05 | 1.72E-03 | 6.79E-05 | 2.70E-05 | 2.03E-04 | 8.20E-06 | <LOQ     | 1.17E-05 | 8.50E-04 | 3.63E-05 |
|                              |                   | 2        | 2.00E-05                        | 4.29E-07 | 3.47E-04 | 4.48E-06 | 7.38E-05 | 3.07E-06 | 1.11E-05 | 7.19E-05 | 4.91E-06 | 6.13E-07 | 1.01E-04 | 3.04E-05 | 2.33E-05 | 2.13E-03 | 2.88E-05 | 1.61E-05 | 2.13E-04 | 3.07E-06 | <LOQ     | 9.20E-06 | 1.85E-04 | 3.00E-05 |
|                              |                   | 3        | 1.99E-05                        | 4.90E-07 | 4.09E-04 | 3.72E-06 | 5.81E-05 | 1.96E-06 | 1.07E-05 | 5.97E-05 | 3.53E-06 | 1.18E-06 | 1.12E-04 | 2.22E-05 | 2.74E-05 | 1.44E-03 | 2.25E-05 | 1.81E-05 | 2.83E-04 | 2.94E-06 | <LOQ     | 6.86E-06 | 2.65E-04 | 1.86E-05 |
|                              |                   | 4        | 1.80E-05                        | 6.77E-07 | 6.37E-04 | 1.26E-05 | 4.40E-05 | 2.63E-06 | 9.48E-06 | 4.28E-05 | 4.14E-06 | 3.01E-06 | 1.49E-04 | 1.84E-05 | 2.81E-04 | 2.94E-03 | 8.58E-05 | 3.71E-05 | 2.64E-04 | 1.58E-05 | <LOQ     | 2.63E-05 | 7.61E-04 | 6.85E-05 |
|                              | Rich              | 1        | 1.14E-05                        | 1.08E-07 | 4.05E-04 | 3.85E-06 | 8.51E-05 | 4.06E-06 | 1.21E-05 | 7.56E-05 | 1.86E-04 | 8.13E-07 | 1.46E-04 | 1.51E-05 | 2.82E-05 | 9.42E-04 | 6.61E-05 | 2.37E-05 | 4.33E-04 | 2.44E-05 | <LOQ     | 1.13E-04 | 1.38E-04 | 5.31E-04 |
|                              |                   | 2        | 5.66E-06                        | 2.67E-07 | 1.28E-03 | 9.62E-06 | 2.29E-05 | 6.95E-06 | 3.26E-06 | 1.38E-05 | 2.88E-05 | 2.46E-06 | 2.09E-04 | 6.79E-06 | 2.24E-05 | 4.67E-04 | 6.79E-05 | 8.45E-05 | 3.29E-04 | 2.19E-05 | <LOQ     | 8.82E-05 | 3.45E-04 | 4.38E-04 |
|                              |                   | 3        | 5.11E-06                        | 1.07E-07 | 6.62E-04 | 5.48E-06 | 2.03E-05 | 6.23E-06 | 4.68E-06 | 1.91E-05 | 6.68E-05 | 1.02E-06 | 1.83E-04 | 8.33E-06 | 2.04E-05 | 6.20E-04 | 9.73E-05 | 5.04E-05 | 4.06E-04 | 3.12E-05 | <LOQ     | 1.24E-04 | 4.31E-04 | 5.84E-04 |
|                              |                   | 4        | 5.42E-06                        | 9.68E-08 | 1.31E-03 | 7.74E-06 | 2.29E-05 | 4.16E-06 | 3.44E-06 | 1.79E-05 | 5.36E-05 | 1.69E-06 | 1.66E-04 | 6.39E-06 | 1.35E-05 | 3.52E-04 | 3.00E-05 | 4.35E-05 | 4.41E-04 | 1.06E-05 | <LOQ     | 4.40E-05 | 1.42E-04 | 2.08E-04 |
| Saccharomyces<br>cerevisiae  | Mineral           | 1        | 1.27E-05                        | 1.84E-07 | 3.39E-03 | 3.98E-05 | 4.68E-05 | 5.68E-05 | 7.56E-06 | 3.85E-05 | 1.12E-05 | <LOD     | 1.16E-04 | 9.75E-05 | 2.93E-02 | 4.72E-02 | 1.72E-03 | 3.20E-05 | 3.40E-04 | 1.43E-03 | 7.19E-06 | 4.37E-04 | 1.40E-03 | 4.70E-04 |
|                              |                   | 2        | 1.92E-05                        | 2.46E-07 | 5.43E-03 | 5.72E-05 | 8.86E-05 | 7.43E-05 | 1.51E-05 | 7.60E-05 | 2.09E-05 | <LOD     | 1.84E-04 | 1.37E-04 | 4.16E-02 | 7.10E-02 | 2.31E-03 | 5.48E-05 | 4.82E-04 | 2.02E-03 | 1.22E-05 | 6.04E-04 | 1.12E-03 | 6.32E-04 |
|                              |                   | 3        | 2.05E-05                        | 2.21E-07 | 6.75E-03 | 5.92E-05 | 8.61E-05 | 7.64E-05 | 1.34E-05 | 7.14E-05 | 2.18E-05 | <LOD     | 2.01E-04 | 1.20E-04 | 3.71E-02 | 6.30E-02 | 2.07E-03 | 6.00E-05 | 5.87E-04 | 1.70E-03 | 1.42E-05 | 5.49E-04 | 9.72E-04 | 6.30E-04 |
|                              |                   | 4        | 1.57E-05                        | 1.23E-07 | 3.54E-03 | 4.13E-05 | 6.73E-05 | 6.76E-05 | 1.39E-05 | 5.85E-05 | 1.75E-05 | <LOD     | 1.51E-04 | 1.21E-04 | 3.80E-02 | 6.01E-02 | 1.91E-03 | 4.48E-05 | 4.28E-04 | 1.66E-03 | 7.50E-06 | 5.27E-04 | 1.09E-03 | 6.10E-04 |
|                              |                   | 5        | 1.77E-05                        | 2.21E-07 | 3.17E-03 | 4.23E-05 | 6.31E-05 | 7.08E-05 | 9.41E-06 | 5.62E-05 | 1.83E-05 | <LOD     | 1.79E-04 | 1.30E-04 | 4.04E-02 | 6.53E-02 | 2.19E-03 | 5.12E-05 | 4.91E-04 | 1.91E-03 | 1.21E-05 | 5.71E-04 | 6.74E-04 | 6.34E-04 |
|                              | Rich              | 1        | 1.66E-05                        | <LOQ     | 3.94E-03 | 7.88E-05 | 8.96E-05 | 7.61E-05 | 1.25E-05 | 7.88E-05 | 2.98E-05 | <LOD     | 1.62E-04 | 7.42E-05 | 5.16E-03 | 6.41E-02 | 3.55E-03 | 7.01E-05 | 4.35E-04 | 3.82E-03 | 4.16E-05 | 2.88E-03 | 7.86E-04 | 1.50E-02 |
|                              |                   | 2        | 1.36E-05                        | <LOQ     | 3.11E-03 | 4.84E-05 | 8.25E-05 | 7.16E-05 | 1.15E-05 | 6.85E-05 | 2.21E-05 | <LOD     | 1.68E-04 | 6.66E-05 | 5.14E-03 | 6.04E-02 | 2.85E-03 | 7.25E-05 | 3.77E-04 | 3.66E-03 | 3.00E-05 | 1.55E-03 | 5.70E-04 | 8.39E-03 |
|                              |                   | 3        | 1.57E-05                        | <LOQ     | 3.77E-03 | 6.29E-05 | 9.93E-05 | 7.58E-05 | 1.39E-05 | 8.43E-05 | 2.76E-05 | <LOD     | 2.14E-04 | 8.72E-05 | 5.97E-03 | 6.57E-02 | 2.92E-03 | 7.10E-05 | 4.43E-04 | 4.03E-03 | 4.57E-05 | 1.47E-03 | 6.21E-04 | 7.73E-03 |
| 4                            | 1.73E-05          | <LOQ     | 4.02E-03                        | 7.28E-05 | 1.10E-04 | 7.55E-05 | 1.49E-05 | 9.79E-05 | 2.66E-05 | <LOD     | 2.00E-04 | 7.00E-05 | 5.58E-03 | 6.82E-02 | 3.53E-03 | 8.80E-05 | 4.25E-04 | 4.16E-03 | 3.75E-05 | 2.39E-03 | 7.21E-04 | 1.26E-02 |          |          |
| Nannochloropsis<br>oceanica  | Mineral           | 1        | <LOQ                            | <LOQ     | 9.31E-05 | 1.26E-05 | 5.23E-04 | 2.23E-05 | 9.02E-05 | 5.92E-04 | 1.13E-04 | 4.85E-06 | 4.56E-05 | 4.27E-05 | 2.96E-02 | 5.40E-02 | 1.89E-03 | 1.77E-04 | 1.14E-04 | 1.07E-04 | 2.33E-05 | 2.04E-04 | 1.52E-03 | 3.59E-04 |
|                              |                   | 2        | <LOQ                            | <LOQ     | 1.79E-04 | 2.14E-05 | 4.31E-04 | 1.49E-05 | 7.43E-05 | 4.85E-04 | 3.81E-05 | 3.71E-06 | 6.82E-05 | 6.22E-05 | 3.95E-02 | 6.53E-02 | 1.70E-03 | 1.27E-04 | 2.09E-04 | 1.49E-04 | 3.11E-05 | 2.79E-04 | 2.18E-03 | 4.64E-04 |
|                              |                   | 3        | <LOQ                            | <LOQ     | 4.47E-05 | 1.49E-05 | 3.89E-04 | 2.48E-05 | 6.70E-05 | 4.75E-04 | 9.55E-05 | 4.96E-06 | 3.47E-05 | 5.71E-05 | 2.56E-02 | 4.18E-02 | 1.56E-03 | 1.60E-04 | 6.08E-05 | 1.24E-04 | 1.61E-05 | 1.86E-04 | 2.65E-03 | 2.85E-04 |
|                              |                   | 4        | <LOQ                            | <LOQ     | 5.56E-05 | 2.46E-05 | 4.26E-04 | 1.77E-05 | 9.68E-05 | 4.90E-04 | 5.30E-05 | 3.75E-06 | 6.37E-05 | 6.47E-05 | 2.60E-02 | 4.43E-02 | 1.52E-03 | 1.34E-04 | 1.97E-04 | 1.07E-04 | 3.10E-05 | 2.57E-04 | 1.57E-03 | 4.55E-04 |
|                              |                   | 5        | <LOQ                            | <LOQ     | 2.09E-05 | 1.30E-05 | 4.14E-04 | 1.51E-05 | 8.43E-05 | 4.71E-04 | 5.40E-05 | 3.60E-06 | 4.68E-05 | 4.32E-05 | 3.19E-02 | 5.21E-02 | 2.05E-03 | 1.04E-04 | 1.28E-04 | 1.44E-04 | 1.95E-05 | 3.17E-04 | 3.56E-03 | 4.68E-04 |
| Phaeodactylum<br>tricornutum | Mineral           | 1        | <LOQ                            | <LOQ     | 7.06E-05 | 3.25E-06 | 2.74E-04 | 9.53E-06 | 4.38E-05 | 2.93E-04 | 4.33E-05 | 2.17E-06 | 5.74E-05 | 2.60E-05 | 2.00E-02 | 2.19E-02 | 5.76E-04 | 4.98E-05 | 6.96E-05 | 2.38E-05 | 1.08E-05 | 9.10E-05 | 8.20E-04 | 1.13E-04 |
|                              |                   | 2        | <LOQ                            | <LOQ     | 6.13E-05 | 3.22E-06 | 2.72E-04 | 2.56E-05 | 4.55E-05 | 3.25E-04 | 3.41E-05 | 1.41E-06 | 3.10E-05 | 2.78E-05 | 1.44E-02 | 1.59E-02 | 7.17E-04 | 2.58E-05 | 9.39E-05 | 7.86E-05 | 5.64E-06 | 1.81E-04 | 2.34E-03 | 4.47E-04 |
|                              |                   | 3        | <LOQ                            | <LOQ     | 5.90E-05 | 2.90E-06 | 3.91E-04 | 1.64E-04 | 7.00E-05 | 4.40E-04 | 5.93E-05 | 2.13E-06 | 2.71E-05 | 4.74E-05 | 7.69E-04 | 8.93E-03 | 2.03E-04 | 4.48E-05 | 7.25E-05 | 1.93E-05 | 1.86E-05 | 8.70E-05 | 7.76E-04 | 1.55E-04 |
|                              |                   | 4        | <LOQ                            | <LOQ     | 3.63E-05 | 2.76E-06 | 3.34E-04 | 5.35E-05 | 6.69E-05 | 3.85E-04 | 4.46E-05 | 1.49E-06 | 2.23E-05 | 3.99E-05 | 4.39E-04 | 1.03E-02 | 2.14E-04 | 9.85E-05 | 4.52E-05 | 2.55E-05 | 1.02E-05 | 1.04E-04 | 5.82E-04 | 2.00E-04 |
|                              |                   | 5        | <LOQ                            | <LOQ     | 4.49E-05 | 2.98E-06 | 3.97E-04 | 3.72E-05 | 6.90E-05 | 4.37E-04 | 5.17E-05 | 1.79E-06 | 2.37E-05 | 5.43E-05 | 8.03E-04 | 1.28E-02 | 2.29E-04 | 1.12E-04 | 4.81E-05 | 1.99E-05 | 1.67E-05 | 9.15E-05 | 6.38E-04 | 1.71E-04 |
| Hek293                       | Rich              | 1        | 1.29E-05                        | 2.58E-07 | 1.60E-05 | 9.20E-05 | 5.58E-05 | 1.83E-04 | 1.98E-05 | 5.26E-05 | 1.19E-05 | 2.19E-05 | 1.59E-04 | 3.10E-04 | 9.14E-02 | 6.02E-02 | 8.24E-03 | 2.20E-05 | 5.23E-04 | 9.38E-04 | 1.86E-05 | 3.09E-03 | 4.37E-02 | 5.82E-03 |
|                              |                   | 2        | 1.32E-05                        | 2.58E-07 | 1.44E-05 | 1.04E-04 | 5.48E-05 | 1.72E-04 | 2.04E-05 | 5.19E-05 | 1.02E-05 | 1.87E-05 | 1.63E-04 | 3.40E-04 | 8.43E-02 | 5.51E-02 | 7.73E-03 | 2.27E-05 | 5.43E-04 | 7.34E-04 | 1.57E-05 | 2.29E-03 | 3.94E-02 | 4.44E-03 |
|                              |                   | 3        | 1.39E-05                        | 1.72E-07 | NA       | 9.17E-05 | 5.29E-05 | 1.46E-04 | 1.87E-05 | 4.74E-05 | 1.09E-05 | 1.91E-05 | 1.51E-04 | 3.16E-04 | 7.49E-02 | 4.91E-02 | 6.76E-03 | 2.22E-05 | 5.45E-04 | 6.68E-04 | 1.64E-05 | 2.10E-03 | 3.06E-02 | 4.39E-03 |
| 4                            | 1.41E-05          | 1.72E-07 | 1.19E-05                        | 8.40E-05 | 5.80E-05 | 1.30E-04 | 1.82E-05 | 5.34E-05 | 9.29E-06 | 2.15E-05 | 1.51E-04 | 3.31E-04 | 7.69E-02 | 4.89E-02 | 6.99E-03 | 2.35E-05 | 5.47E-04 | 6.90E-04 | 1.52E-05 | 2.23E-03 | 2.84E-02 | 4.38E-03 |          |          |
| HeLa S3                      | Rich              | 1        | 1.02E-05                        | 1.34E-07 | 1.39E-05 | 2.43E-05 | 1.19E-04 | 2.86E-04 | 3.99E-05 | 1.28E-04 | 1.45E-05 | 5.11E-06 | 1.01E-04 | 1.10E-04 | 7.66E-02 | 3.61E-02 | 1.02E-02 | 1.50E-05 | 4.03E-04 | 1.35E-03 | 2.08E-05 | 4.50E-03 | 3.42E-02 | 8.50E-03 |
|                              |                   | 2        | 1.05E-05                        | 1.34E-07 | 1.04E-05 | 2.49E-05 | 1.11E-04 | 2.57E-04 | 4.20E-05 | 1.09E-04 | 1.67E-05 | 4.64E-06 | 1.00E-04 | 1.16E-04 | 7.04E-02 | 3.27E-02 | 9.75E-03 | 1.34E-05 | 4.47E-04 | 1.28E-03 | 2.22E-05 | 4.10E-03 | 3.12E-02 | 7.64E-03 |
|                              |                   | 3        | 1.51E-05                        | 2.02E-07 | 5.99E-04 | NA       | 1.48E-04 | 3.29E-04 | 5.26E-05 | 1.48E-04 | 1.94E-05 | 7.46E-06 | 1.49E-04 | 1.48E-04 | 7.83E-02 | 4.33E-02 | 1.04E-02 | 5.22E-05 | 6.09E-04 | 1.39E-03 | 3.13E-05 | 4.74E-03 | 3.02E-02 | 8.69E-03 |
|                              |                   | 4        | 1.06E-05                        | 1.34E-07 | 6.86E-06 | 2.53E-05 | 1.02E-04 | 2.79E-04 | 3.48E-05 | 9.76E-05 | 1.32E-05 | 5.04E-06 | 1.04E-04 | 1.11E-04 | 7.59E-02 | 3.63E-02 | 1.02E-02 | 1.51E-05 | 4.20E-04 | 1.34E-03 | 1.94E-05 | 4.52E-03 | 2.99E-02 | 8.36E-03 |
|                              |                   | 5        | 1.26E-05                        | 1.34E-07 | NA       | 2.16E-05 | 1.42E-04 | 2.80E-04 | 5.02E-05 | 1.50E-04 | 2.29E-05 | 8.14E-06 | 1.16E-04 | 1.18E-04 | 7.20E-02 | 3.30E-02 | 1.04E-02 | 1.95E-05 | 5.11     |          |          |          |          |          |

Table S2 Intracellular concentrations: Continued

| Organism/<br>cell line      | Culture<br>medium            | Replica  | Intracellular concentration (M) |          |          |          |          |          |          |          |          |          |          |          |          |          |          |          |          |                 |          |          |          |          |          |
|-----------------------------|------------------------------|----------|---------------------------------|----------|----------|----------|----------|----------|----------|----------|----------|----------|----------|----------|----------|----------|----------|----------|----------|-----------------|----------|----------|----------|----------|----------|
|                             |                              |          | Lys                             | M6P      | Mal      | Met      | PEP      | Phe      | Pro      | PRPP     | Pyr      | R5P      | S7P      | Ser      | Suc      | Thr      | Trp      | Tyr      | UDP      | UDP-Glc-<br>Nac | UDP-glu  | UMP      | UTP      | Val      |          |
| Bacillus subtilis           | Mineral                      | 1        | 2.22E-05                        | 4.17E-05 | 4.80E-06 | 1.17E-05 | 4.47E-05 | 5.85E-06 | 8.20E-06 | 4.77E-05 | 1.16E-04 | 7.17E-05 | 2.33E-04 | 8.43E-05 | 8.37E-05 | 2.93E-05 | <LOQ     | 1.05E-05 | 3.42E-05 | 1.29E-04        | 8.32E-05 | 7.26E-05 | 1.46E-04 | 3.16E-05 |          |
|                             |                              | 2        | 1.84E-05                        | 2.99E-05 | 3.62E-06 | 7.97E-06 | 3.89E-05 | 5.52E-06 | 4.29E-06 | 1.43E-04 | 3.69E-05 | 9.85E-05 | 1.95E-04 | 3.80E-05 | 4.71E-05 | 2.39E-05 | <LOQ     | 7.97E-06 | 2.64E-05 | 1.17E-04        | 1.01E-04 | 8.09E-05 | 1.66E-04 | 2.70E-05 |          |
|                             |                              | 3        | 4.90E-06                        | 2.76E-05 | 3.04E-06 | 6.86E-06 | 2.52E-05 | 2.94E-06 | 4.90E-06 | 1.10E-04 | 3.05E-05 | 7.35E-05 | 1.31E-04 | 3.04E-05 | 6.23E-05 | 1.18E-05 | <LOQ     | 3.92E-06 | 9.21E-06 | 1.35E-04        | 8.65E-05 | 6.89E-05 | 1.60E-04 | 1.86E-05 |          |
|                             |                              | 4        | 4.06E-05                        | 2.43E-05 | 5.49E-06 | 1.13E-05 | 7.37E-06 | 1.66E-05 | 1.58E-05 | 9.58E-05 | 8.20E-05 | 7.13E-05 | 1.22E-04 | 7.83E-05 | 6.70E-05 | 5.27E-05 | <LOQ     | 1.66E-05 | 2.53E-05 | 1.63E-04        | 1.11E-04 | 8.56E-05 | 1.44E-04 | 4.36E-05 |          |
|                             | Rich                         | 1        | 2.93E-04                        | 3.24E-05 | 1.02E-05 | 4.93E-05 | 1.54E-05 | 1.21E-04 | 3.36E-05 | 1.74E-04 | 6.05E-05 | 6.54E-05 | 5.79E-05 | 8.56E-05 | 3.61E-05 | 9.48E-05 | 8.67E-06 | 2.49E-05 | 1.32E-05 | 9.20E-05        | 3.08E-05 | 2.67E-05 | 5.52E-05 | 1.41E-04 |          |
|                             |                              | 2        | 2.06E-04                        | 8.34E-06 | 1.41E-05 | 4.06E-05 | 2.77E-05 | 9.67E-05 | 2.78E-05 | 2.44E-05 | 3.45E-05 | 2.49E-05 | 3.71E-05 | 8.44E-05 | 4.19E-05 | 8.39E-05 | 4.27E-06 | 2.08E-05 | 1.77E-05 | 6.01E-05        | 1.86E-05 | 2.17E-05 | 4.03E-05 | 1.14E-04 |          |
|                             |                              | 3        | 2.83E-04                        | 1.03E-05 | 1.13E-05 | 5.43E-05 | 1.32E-05 | 1.31E-04 | 3.76E-05 | 1.42E-05 | 4.90E-05 | 2.84E-05 | 2.71E-05 | 1.26E-04 | 3.97E-05 | 1.09E-04 | 1.34E-05 | 2.90E-05 | 9.84E-06 | 5.27E-05        | 1.83E-05 | 1.64E-05 | 2.67E-05 | 1.55E-04 |          |
|                             |                              | 4        | 1.41E-04                        | 8.81E-06 | 1.16E-05 | 1.89E-05 | 1.35E-05 | 4.69E-05 | 1.40E-05 | 2.59E-05 | 2.08E-05 | 2.94E-05 | 3.40E-05 | 3.82E-05 | 3.41E-05 | 4.21E-05 | 1.45E-06 | 1.02E-05 | 7.89E-06 | 5.04E-05        | 1.37E-05 | 1.17E-05 | 2.50E-05 | 5.71E-05 |          |
| Saccharomyces<br>cerevisiae | Mineral                      | 1        | 2.97E-03                        | 2.35E-05 | 2.56E-04 | 1.14E-04 | 4.44E-05 | 3.14E-04 | 5.82E-04 | 5.95E-05 | 1.52E-03 | 1.02E-04 | 2.98E-04 | 2.64E-03 | 3.51E-04 | 2.87E-03 | 5.44E-05 | 2.34E-04 | 5.65E-05 | 2.82E-04        | 2.63E-04 | 1.27E-04 | 2.99E-04 | 1.58E-03 |          |
|                             |                              | 2        | 4.36E-03                        | 4.80E-05 | 3.68E-04 | 1.57E-04 | 7.52E-05 | 4.05E-04 | 8.29E-04 | 8.31E-05 | 1.89E-03 | 1.29E-04 | 4.58E-04 | 3.80E-03 | 5.28E-04 | 3.82E-03 | 7.13E-05 | 3.18E-04 | 9.68E-05 | 4.16E-04        | 4.34E-04 | 1.97E-04 | 4.35E-04 | 2.29E-03 |          |
|                             |                              | 3        | 3.45E-03                        | 5.17E-05 | 3.85E-04 | 1.49E-04 | 7.98E-05 | 3.95E-04 | 7.41E-04 | 1.50E-04 | 1.67E-03 | 1.58E-04 | 4.97E-04 | 3.35E-03 | 5.81E-04 | 3.12E-03 | 6.64E-05 | 3.16E-04 | 1.23E-04 | 4.81E-04        | 4.44E-04 | 2.09E-04 | 5.16E-04 | 2.08E-03 |          |
|                             |                              | 4        | 2.95E-03                        | 3.59E-05 | 3.04E-04 | 1.40E-04 | 6.47E-05 | 3.86E-04 | 7.24E-04 | 6.22E-05 | 1.56E-03 | 1.50E-04 | 3.37E-04 | 3.06E-03 | 4.93E-04 | 2.98E-03 | 6.52E-05 | 3.11E-04 | 6.93E-05 | 3.75E-04        | 3.85E-04 | 1.75E-04 | 3.99E-04 | 2.22E-03 |          |
|                             |                              | 5        | 4.22E-03                        | 2.88E-05 | 3.42E-04 | 1.44E-04 | 6.20E-05 | 3.92E-04 | 7.69E-04 | 7.98E-05 | 1.48E-03 | 1.16E-04 | 3.67E-04 | 3.53E-03 | 5.15E-04 | 3.48E-03 | 6.97E-05 | 3.16E-04 | 9.37E-05 | 4.09E-04        | 3.50E-04 | 1.68E-04 | 4.28E-04 | 2.14E-03 |          |
|                             | Rich                         | 1        | 1.31E-02                        | 4.99E-05 | 4.03E-04 | 1.66E-03 | 8.51E-05 | 3.32E-03 | 1.91E-03 | 7.13E-05 | 1.66E-03 | 3.70E-05 | 1.18E-04 | 4.88E-03 | 6.49E-04 | 4.99E-03 | 7.35E-04 | 7.14E-04 | 1.14E-04 | 3.84E-04        | 3.73E-04 | 1.92E-04 | 4.68E-04 | 3.99E-03 |          |
|                             |                              | 2        | 9.52E-03                        | 4.62E-05 | 3.71E-04 | 1.01E-03 | 8.09E-05 | 1.86E-03 | 1.57E-03 | 5.77E-05 | 1.31E-03 | 3.07E-05 | 1.08E-04 | 3.87E-03 | 4.85E-04 | 3.96E-03 | 3.14E-04 | 3.90E-04 | 1.27E-04 | 3.82E-04        | 3.79E-04 | 1.74E-04 | 3.77E-04 | 2.43E-03 |          |
|                             |                              | 3        | 1.09E-02                        | 4.70E-05 | 3.94E-04 | 1.01E-03 | 8.78E-05 | 1.72E-03 | 1.58E-03 | 7.02E-05 | 1.73E-03 | 3.78E-05 | 1.25E-04 | 3.95E-03 | 5.22E-04 | 4.44E-03 | 2.58E-04 | 3.72E-04 | 1.34E-04 | 4.56E-04        | 4.40E-04 | 2.02E-04 | 4.54E-04 | 2.29E-03 |          |
| Nannochloropsis<br>oceanica | Mineral                      | 4        | 1.24E-02                        | 5.53E-05 | 3.86E-04 | 1.44E-03 | 8.63E-05 | 2.81E-03 | 1.86E-03 | 7.52E-05 | 1.38E-03 | 3.30E-05 | 1.21E-04 | 4.78E-03 | 5.69E-04 | 4.89E-03 | 5.63E-04 | 6.39E-04 | 1.42E-04 | 4.21E-04        | 3.96E-04 | 2.01E-04 | 4.54E-04 | 3.45E-03 |          |
|                             |                              | 1        | 1.59E-03                        | 3.39E-04 | 9.41E-05 | 1.55E-04 | 9.70E-05 | 2.91E-04 | 1.38E-01 | 1.28E-04 | 8.76E-04 | 4.07E-05 | 4.16E-04 | 1.64E-03 | 6.39E-04 | 6.69E-04 | 5.82E-05 | 2.43E-04 | 2.52E-05 | 4.75E-05        | 1.86E-04 | 1.86E-04 | 8.63E-05 | 8.92E-04 |          |
|                             |                              | 2        | 1.69E-03                        | 2.26E-04 | 1.12E-04 | 2.14E-04 | 7.43E-05 | 3.06E-04 | 1.58E-01 | 2.18E-05 | 4.02E-04 | 3.53E-05 | 3.09E-04 | 1.81E-03 | 2.64E-04 | 8.08E-04 | 5.57E-05 | 2.27E-04 | 2.88E-05 | 5.76E-05        | 2.01E-04 | 2.01E-04 | 1.48E-04 | 1.22E-03 |          |
|                             |                              | 3        | 1.03E-03                        | 1.98E-04 | 1.07E-04 | 2.48E-05 | 6.82E-05 | 2.36E-04 | 1.25E-01 | 1.49E-05 | 1.11E-03 | 3.35E-05 | 3.50E-04 | 1.13E-03 | 5.37E-04 | 5.46E-04 | 2.48E-05 | 1.49E-04 | 2.98E-05 | 4.59E-05        | 2.07E-04 | 2.01E-04 | 4.59E-05 | 6.95E-04 |          |
|                             |                              | 4        | 1.11E-03                        | 2.80E-04 | 1.25E-04 | 1.34E-04 | 1.44E-04 | 2.89E-04 | 1.20E-01 | 7.49E-06 | 3.87E-04 | 2.14E-05 | 3.00E-04 | 1.46E-03 | 2.96E-04 | 5.51E-04 | 3.75E-05 | 1.77E-04 | 3.48E-05 | 5.99E-05        | 1.80E-04 | 2.19E-04 | 1.73E-04 | 9.42E-04 |          |
|                             | 5                            | 1.43E-03 | 2.66E-04                        | 8.29E-05 | 1.15E-04 | 1.15E-04 | 3.60E-04 | 1.49E-01 | 5.04E-06 | 3.41E-04 | 2.67E-05 | 3.59E-04 | 1.74E-03 | 3.86E-04 | 7.57E-04 | 4.32E-05 | 2.16E-04 | 3.89E-05 | 3.89E-05 | 1.28E-04        | 1.51E-04 | 1.07E-04 | 1.07E-03 |          |          |
|                             | Phaeodactylum<br>tricornutum | Mineral  | 1                               | 2.69E-03 | 6.89E-05 | 5.70E-05 | <LOD     | 1.26E-05 | 8.45E-05 | 3.63E-02 | 1.32E-05 | 2.60E-05 | 3.14E-05 | 2.74E-04 | 4.16E-04 | 1.29E-04 | 2.77E-04 | 2.17E-06 | 2.38E-05 | 2.77E-05        | 8.23E-06 | 5.85E-05 | 7.06E-05 | 2.58E-05 | 4.55E-04 |
|                             |                              |          | 2                               | 2.16E-03 | 1.02E-04 | 5.91E-05 | <LOD     | 1.53E-05 | 1.51E-04 | 3.26E-02 | 1.73E-05 | 8.46E-05 | 3.33E-05 | 4.75E-04 | 5.76E-04 | 1.06E-04 | 3.53E-04 | 1.41E-05 | 6.25E-05 | 8.67E-06        | 8.46E-06 | 5.62E-05 | 7.09E-05 | 4.55E-05 | 5.28E-04 |
| 3                           |                              |          | 3.46E-04                        | 1.67E-04 | 2.61E-04 | <LOD     | 3.13E-05 | 5.22E-05 | 2.09E-02 | 7.35E-06 | 7.11E-05 | 4.89E-05 | 7.46E-04 | 3.87E-04 | 9.61E-04 | 1.68E-04 | 2.13E-05 | 4.06E-05 | 5.41E-06 | 1.66E-05        | 7.89E-05 | 1.18E-04 | 2.86E-05 | 3.13E-04 |          |
| 4                           |                              |          | 2.84E-04                        | 1.80E-04 | 1.34E-04 | <LOD     | 1.95E-05 | 5.52E-05 | 1.66E-02 | 8.28E-06 | 6.39E-05 | 4.59E-05 | 7.87E-04 | 4.42E-04 | 9.00E-04 | 1.51E-04 | 2.76E-05 | 4.88E-05 | 8.92E-06 | 9.55E-06        | 5.56E-05 | 9.57E-05 | 1.25E-05 | 3.18E-04 |          |
| Hek293                      | Rich                         | 5        | 2.80E-04                        | 2.15E-04 | 1.72E-04 | <LOD     | 2.35E-05 | 6.16E-05 | 2.32E-02 | 5.96E-06 | 8.49E-05 | 4.69E-05 | 8.38E-04 | 4.23E-04 | 1.32E-03 | 1.57E-04 | 2.19E-05 | 3.98E-05 | 9.74E-06 | 1.39E-05        | 7.77E-05 | 1.37E-04 | 1.47E-05 | 3.10E-04 |          |
|                             |                              | 1        | 3.35E-03                        | 4.17E-05 | 7.17E-04 | 1.01E-03 | 5.51E-06 | 1.86E-03 | 3.43E-03 | 2.07E-05 | 1.01E-03 | 2.12E-05 | 2.51E-05 | 2.12E-03 | 3.01E-04 | 7.71E-03 | 4.19E-04 | 1.81E-03 | 1.57E-04 | 6.22E-04        | 2.36E-04 | 1.66E-04 | 6.23E-04 | 3.24E-03 |          |
|                             |                              | 2        | 2.59E-03                        | 4.01E-05 | 6.53E-04 | 8.50E-04 | 5.42E-06 | 1.43E-03 | 3.40E-03 | 2.25E-05 | 5.87E-04 | 2.03E-05 | 2.63E-05 | 1.71E-03 | 2.22E-04 | 7.01E-03 | 3.58E-04 | 1.40E-03 | 1.61E-04 | 6.51E-04        | 2.54E-04 | 1.67E-04 | 6.49E-04 | 2.45E-03 |          |
|                             |                              | 3        | 2.36E-03                        | 3.45E-05 | 5.33E-04 | 7.47E-04 | 3.87E-06 | 1.26E-03 | 3.03E-03 | 2.47E-05 | 6.37E-04 | 2.17E-05 | 2.32E-05 | 1.62E-03 | 1.95E-04 | 6.36E-03 | 3.21E-04 | 1.26E-03 | 1.43E-04 | 6.56E-04        | 2.48E-04 | 1.69E-04 | 6.74E-04 | 2.24E-03 |          |
| HeLa S3                     | Rich                         | 4        | 2.58E-03                        | 3.66E-05 | 4.89E-04 | 7.56E-04 | 4.30E-06 | 1.31E-03 | 2.80E-03 | 2.38E-05 | 5.92E-04 | 2.19E-05 | 2.23E-05 | 1.70E-03 | 2.01E-04 | 6.27E-03 | 3.24E-04 | 1.35E-03 | 1.40E-04 | 6.47E-04        | 2.43E-04 | 1.67E-04 | 6.87E-04 | 2.38E-03 |          |
|                             |                              | 1        | 3.27E-03                        | 9.81E-05 | 1.12E-03 | 1.28E-03 | 4.10E-06 | 2.80E-03 | 1.18E-03 | 3.89E-05 | 1.34E-03 | 1.57E-05 | 9.37E-05 | 9.36E-04 | 3.40E-04 | 8.04E-03 | 7.28E-04 | 3.02E-03 | 9.66E-05 | 1.43E-03        | 3.55E-04 | 3.49E-04 | 5.64E-04 | 4.47E-03 |          |
|                             |                              | 2        | 3.13E-03                        | 9.70E-05 | 1.06E-03 | 1.18E-03 | 4.91E-06 | 2.64E-03 | 1.12E-03 | 4.24E-05 | 1.20E-03 | 2.00E-05 | 1.14E-04 | 9.66E-04 | 3.09E-04 | 7.35E-03 | 6.82E-04 | 2.73E-03 | 9.35E-05 | 1.64E-03        | 3.75E-04 | 3.83E-04 | 6.08E-04 | 4.12E-03 |          |
|                             |                              | 3        | 3.27E-03                        | 1.11E-04 | 1.45E-03 | 1.28E-03 | 1.27E-05 | 2.78E-03 | 1.21E-03 | 8.49E-05 | 1.61E-03 | 2.49E-05 | 1.67E-04 | 9.02E-04 | 4.04E-04 | 8.28E-03 | 6.73E-04 | 3.15E-03 | 1.71E-04 | 2.54E-03        | 5.54E-04 | 5.86E-04 | 8.70E-04 | 4.55E-03 |          |
|                             |                              | 4        | 3.16E-03                        | 8.32E-05 | 1.17E-03 | 1.25E-03 | 3.97E-06 | 2.76E-03 | 1.19E-03 | 4.17E-05 | 1.10E-03 | 1.65E-05 | 8.85E-05 | 8.00E-04 | 3.03E-04 | 8.03E-03 | 7.02E-04 | 2.87E-03 | 1.06E-04 | 1.47E-03        | 3.54E-04 | 3.66E-04 | 6.13E-04 | 4.32E-03 |          |
| NB4                         | Rich                         | 5        | 3.73E-03                        | 1.14E-04 |          |          |          |          |          |          |          |          |          |          |          |          |          |          |          |                 |          |          |          |          |          |
