# Supplementary material for: Absolute Quantification of the Central Carbon Metabolome in Eight Commonly Applied Prokaryotic and Eukaryotic Model Systems
Source: MDPI journal article supplement (doi:10.3390/metabo10020074), 2020-02-19
Supplement: s1 [file s1]

**Table S4 YMDB entries:** Average (AVG) intracellular concentration (μM) ± standard deviation (SD) of all metabolites included in the panel for metabolite profiling of *Saccharomyces cerevisiae* cultured in mineral and rich media, listed with respective Yeast Metabolome Database (YMDB) IDs and range of concentration entries. TCA; tricarboxylic acid, PPP; pentose phosphate pathway. Metabolite abbreviations are listed in Table S1.

| Class                  | Metabolite  | YMDB ID   | Concentration (μM)        |                        |                       |
|------------------------|-------------|-----------|---------------------------|------------------------|-----------------------|
|                        |             |           | Mineral media<br>(AVG±SD) | Rich media<br>(AVG±SD) | YMDB (Range)          |
| Glycolysis             | G6P         | YMDB00947 | 60,1 ± 14,7               | 82,4 ± 12,2            | 2300 ± 200            |
|                        | F6P         | YMDB00078 | 70,4 ± 17,3               | 95,3 ± 11,8            | 650 ± 30              |
|                        | F1,6BP      | YMDB00108 | 4457,5 ± 1567,8           | 3710,3 ± 410,6         | 50-3500 ± 0-1000      |
|                        | 2PG         | YMDB00675 | 715,7 ± 171,2             | 697,2 ± 57,4           | NA                    |
|                        | 3PG         | YMDB00756 | 715,7 ± 171,2             | 697,2 ± 57,4           | 120-630 ± 10-100      |
|                        | PEP         | YMDB00276 | 65,2 ± 13,7               | 85,0 ± 2,9             | 15 ± 15               |
|                        | Pyr         | YMDB00175 | 1621,6 ± 163,5            | 1521,1 ± 204,3         | 100-5000 ± 0-5000     |
| PPP                    | 6PG         | YMDB00218 | 207,3 ± 57,6              | 75,6 ± 5,4             | 200 ± 100             |
|                        | R5P         | YMDB00119 | 131,0 ± 23,2              | 34,6 ± 3,3             | NA                    |
|                        | S7P         | YMDB00752 | 391,6 ± 83,4              | 118,0 ± 7,2            | NA                    |
| Other sugar phosphates | F1P         | YMDB00655 | 48,0 ± 9,4                | 65,7 ± 13,3            | NA                    |
|                        | G1P         | YMDB00288 | 11,9 ± 3,2                | 13,2 ± 1,5             | 100 ± 0               |
|                        | M1P         | YMDB00386 | 11,9 ± 3,2                | 13,2 ± 1,5             | NA                    |
|                        | GAL1P       | YMDB00004 | 17,9 ± 4,2                | 26,5 ± 3,3             | NA                    |
|                        | GL3P        | YMDB00073 | 121,0 ± 15,0              | 74,5 ± 9,0             | NA                    |
|                        | M6P         | YMDB00242 | 37,6 ± 12,1               | 49,6 ± 4,1             | NA                    |
|                        | UDP-glu     | YMDB00415 | 375,1 ± 73,3              | 397,0 ± 30,5           | 300 ± 0               |
|                        | UDP-Glc-Nac | YMDB00277 | 392,5 ± 72,9              | 410,8 ± 35,1           | NA                    |
|                        | PRPP        | YMDB00402 | 86,9 ± 36,7               | 68,6 ± 7,6             | NA                    |
| TCA cycle              | Lac         | YMDB00247 | 1050,6 ± 262,1            | 674,2 ± 97,2           | NA                    |
|                        | Cit         | YMDB00086 | 766,7 ± 182,0             | 775,1 ± 61,6           | 200-13500 ± 0-9500    |
|                        | Icit        | YMDB00026 | 10,6 ± 3,1                | 38,7 ± 6,7             | NA                    |
|                        | aKG         | YMDB00153 | 117,6 ± 22,2              | 649,9 ± 103,6          | 10-5500 ± 0-2300      |
|                        | Suc         | YMDB00338 | 493,5 ± 85,9              | 555,9 ± 70,9           | 600 ± 130             |
|                        | Fum         | YMDB00101 | 69,2 ± 7,7                | 74,8 ± 2,1             | NA                    |
|                        | Mal         | YMDB00280 | 330,9 ± 51,9              | 388,5 ± 13,8           | 2515 ± 126            |
| Nucleoside phosphates  | AMP         | YMDB00097 | 222,6 ± 40,2              | 254,1 ± 26,1           | 100-600 ± 20-300      |
|                        | ADP         | YMDB00914 | 839,6 ± 160,1             | 657,3 ± 42,3           | 300-1400 ± 20-800     |
|                        | ATP         | YMDB00109 | 1795,3 ± 322,1            | 1183,4 ± 105,8         | 1200-2800 ± 100-1750  |
|                        | GMP         | YMDB00261 | 48,6 ± 10,8               | 75,4 ± 8,5             | NA                    |
|                        | GDP         | YMDB00257 | 166,1 ± 33,2              | 186,1 ± 25,0           | NA                    |
|                        | GTP         | YMDB00558 | 465,4 ± 90,3              | 420,0 ± 29,5           | NA                    |
|                        | CMP         | YMDB00406 | 13,0 ± 4,2                | 22,2 ± 4,5             | NA                    |
|                        | CDP         | YMDB00064 | 74,4 ± 22,7               | 79,1 ± 8,3             | NA                    |
|                        | CTP         | YMDB00279 | 324,8 ± 59,3              | 259,1 ± 26,2           | NA                    |
|                        | UMP         | YMDB00049 | 175,4 ± 31,5              | 192,2 ± 12,9           | NA                    |
|                        | UDP         | YMDB00307 | 87,8 ± 25,7               | 129,2 ± 11,7           | NA                    |
|                        | UTP         | YMDB00326 | 415,4 ± 78,5              | 438,2 ± 41,2           | NA                    |
| Deoxynucleotides       | dAMP        | YMDB00451 | 0,5 ± 0,1                 | 1,0 ± 0,2              | NA                    |
|                        | dADP        | YMDB00901 | 22,5 ± 4,8                | 25,7 ± 2,2             | NA                    |
|                        | dATP        | YMDB00700 | 23,3 ± 3,8                | 21,9 ± 1,5             | 44 ± 0                |
|                        | dGTP        | YMDB00744 | 8,4 ± 1,8                 | 7,9 ± 0,5              | 18 ± 0                |
|                        | dCTP        | YMDB00658 | 9,2 ± 1,9                 | 8,3 ± 0,7              | 16 ± 0                |
|                        | dUMP        | YMDB00221 | 0,2 ± 0,0                 | <LOQ                   | NA                    |
|                        | dTMP        | YMDB00162 | 1,4 ± 0,2                 | 1,5 ± 0,1              | NA                    |
|                        | dTDP        | YMDB00205 | 6,6 ± 2,1                 | 9,3 ± 1,1              | NA                    |
|                        | dTTP        | YMDB00745 | 17,2 ± 3,0                | 15,8 ± 1,6             | 70 ± 0                |
| Amino acids            | Ala         | YMDB00154 | 9339,6 ± 1493,8           | 9541,6 ± 1269,4        | 6000-19000 ± 100-3000 |
|                        | Arg         | YMDB00592 | 12410,1 ± 2146,4          | 10230,7 ± 819,2        | 2000-190000 ± 0-7000  |
|                        | Asn         | YMDB00226 | 1252,2 ± 206,4            | 1745,5 ± 316,3         | 400-800 ± 20-120      |
|                        | Asp         | YMDB00896 | 12560,1 ± 1857,0          | 24020,5 ± 1216,5       | 600-8000 ± 10-5000    |
|                        | Gln         | YMDB00002 | 37294,5 ± 4816,5          | 5461,9 ± 390,5         | 15000-17000 ± 0-2000  |
|                        | Glu         | YMDB00271 | 61334,9 ± 8852,3          | 64614,4 ± 3260,6       | 1200-80000 ± 20-12500 |
|                        | Gly         | YMDB00016 | 2039,8 ± 233,1            | 3213,6 ± 380,2         | 780-15000 ± 0-145     |
|                        | His         | YMDB00369 | 1744,3 ± 226,7            | 3918,2 ± 218,4         | 800-9000 ± 40-200     |
|                        | Ile         | YMDB00038 | 537,6 ± 62,9              | 2071,0 ± 677,4         | 150-6200 ± 3-120      |
|                        | Leu         | YMDB00387 | 595,2 ± 70,5              | 10950,3 ± 3489,0       | 235-2700 ± 5-150      |
|                        | Lys         | YMDB00330 | 3591,6 ± 672,4            | 11489,7 ± 1602,5       | 300-3600 ± 5-200      |
|                        | Met         | YMDB00318 | 141,0 ± 16,3              | 1280,2 ± 325,2         | 50-600 ± 1-30         |
|                        | Phe         | YMDB00304 | 378,2 ± 36,8              | 2428,5 ± 766,4         | 186-3000 ± 4-70       |
|                        | Pro         | YMDB00378 | 729,0 ± 91,3              | 1729,4 ± 180,4         | 1075 ± 54             |
|                        | Ser         | YMDB00112 | 3276,2 ± 445,5            | 4368,8 ± 532,1         | 293-5800 ± 6-115      |
|                        | Thr         | YMDB00214 | 3253,2 ± 392,3            | 4570,4 ± 473,1         | 600-4200 ± 10-200     |
|                        | Trp         | YMDB00126 | 65,4 ± 6,6                | 467,3 ± 222,2          | 240-450 ± 20-70       |
|                        | Tyr         | YMDB00364 | 299,3 ± 36,5              | 528,6 ± 173,5          | 170-4000 ± 6-80       |
|                        | Val         | YMDB00152 | 2061,7 ± 282,5            | 3040,1 ± 814,8         | 525-2800 ± 10-140     |
