# Supplementary material for: Absolute Quantification of the Central Carbon Metabolome in Eight Commonly Applied Prokaryotic and Eukaryotic Model Systems
Source: MDPI journal article supplement (doi:10.3390/metabo10020074), 2020-02-19
Supplement: s1 [file s1]

**Table S1 Metabolite abbreviations:** Metabolites included in panel for metabolite profiling, sorted on metabolite class and listed with abbreviation, Yeast- and Human Metabolome Database (YMDB and HMDB) IDs, and CAS number. TCA; tricarboxylic acid, PPP; pentose phosphate pathway.

| Class                  | Abbreviation | Metabolite                              | YMDB ID   | HMDB ID     | CAS number |
|------------------------|--------------|-----------------------------------------|-----------|-------------|------------|
| Glycolysis             | G6P          | Glucose 6-phosphate                     | YMDB00947 | HMDB0001401 | 56-73-5    |
|                        | F6P          | Fructose 6-phosphate                    | YMDB00078 | HMDB0000124 | 643-13-0   |
|                        | F1,6BP       | Fructose 1,6-bisphosphate               | YMDB00108 | HMDB0001058 | 488-69-7   |
|                        | 2PG          | 2-Phosphoglyceric acid                  | YMDB00675 | HMDB0000807 | 2553-59-5  |
|                        | 3PG          | 3-Phosphoglyceric acid                  | YMDB00756 | HMDB0000362 | 820-11-1   |
|                        | PEP          | Phosphoenolpyruvic acid                 | YMDB00276 | HMDB0000263 | 138-08-9   |
|                        | Pyr          | Pyruvic acid                            | YMDB00175 | HMDB0000243 | 127-17-3   |
| PPP                    | 6PG          | 6-Phosphogluconic acid                  | YMDB00218 | HMDB0001316 | 921-62-0   |
|                        | R5P          | Ribose 5-phosphate                      | YMDB00119 | HMDB0001548 | 3615-55-2  |
|                        | S7P          | Sedoheptulose 7-phosphate               | YMDB00752 | HMDB0001068 | 2646-35-7  |
| Other sugar phosphates | F1P          | Fructose 1-phosphate                    | YMDB00655 | HMDB0001076 | 15978-08-2 |
|                        | G1P          | Glucose 1-phosphate                     | YMDB00288 | HMDB0001586 | 59-56-3    |
|                        | M1P          | Mannose 1-phosphate                     | YMDB00386 | HMDB0006330 | 27251-84-9 |
|                        | GAL1P        | Galactose 1-phosphate                   | YMDB00004 | HMDB0000645 | 2255-14-3  |
|                        | GAL6P        | Galactose 6-phosphate                   | YMDB02311 | -           | NA         |
|                        | GL3P         | Glycerol 3-phosphate                    | YMDB00073 | HMDB0000126 | 17989-41-2 |
|                        | M6P          | Mannose 6-phosphate                     | YMDB00242 | HMDB0001078 | 3672-15-9  |
|                        | UDP-glu      | Uridine diphosphate glucose             | YMDB00415 | HMDB0000286 | 133-89-1   |
|                        | UDP-Glc-Nac  | Uridine diphosphate-N-acetylglucosamine | YMDB00277 | HMDB0000290 | 528-04-1   |
|                        | PRPP         | Phosphoribosyl pyrophosphate            | YMDB00402 | HMDB0000280 | 7540-64-9  |
| TCA cycle              | Lac          | Lactic acid                             | YMDB00247 | HMDB0000190 | 79-33-4    |
|                        | Cit          | Citric acid                             | YMDB00086 | HMDB0000094 | 77-92-9    |
|                        | ICit         | Isocitric acid                          | YMDB00026 | HMDB0000193 | 320-77-4   |
|                        | aKG          | a-Ketoglutaric acid                     | YMDB00153 | HMDB0000208 | 328-50-7   |
|                        | Suc          | Succinic acid                           | YMDB00338 | HMDB0000254 | 110-15-6   |
|                        | Fum          | Fumaric acid                            | YMDB00101 | HMDB0000134 | 110-17-8   |
|                        | Mal          | Malic acid                              | YMDB00280 | HMDB0000156 | 97-67-6    |
| Nucleoside phosphates  | AMP          | Adenosine monophosphate                 | YMDB00097 | HMDB0000045 | 61-19-8    |
|                        | ADP          | Adenosine diphosphate                   | YMDB00914 | HMDB0001341 | 58-64-0    |
|                        | ATP          | Adenosine triphosphate                  | YMDB00109 | HMDB0000538 | 56-65-5    |
|                        | GMP          | Guanosine monophosphate                 | YMDB00261 | HMDB0001397 | 85-32-5    |
|                        | GDP          | Guanosine diphosphate                   | YMDB00257 | HMDB0001201 | 146-91-8   |
|                        | GTP          | Guanosine triphosphate                  | YMDB00558 | HMDB0001273 | 86-01-1    |
|                        | CMP          | Cytidine monophosphate                  | YMDB00406 | HMDB0000095 | 63-37-6    |
|                        | CDP          | Cytidine diphosphate                    | YMDB00064 | HMDB0001546 | 63-38-7    |
|                        | CTP          | Cytidine triphosphate                   | YMDB00279 | HMDB0000082 | 65-47-4    |
|                        | UMP          | Uridine monophosphate                   | YMDB00049 | HMDB0000288 | 58-97-9    |
|                        | UDP          | Uridine diphosphate                     | YMDB00307 | HMDB0000295 | 58-98-0    |
|                        | UTP          | Uridine triphosphate                    | YMDB00326 | HMDB0000285 | 63-39-8    |
| Deoxynucleotide sugars | dAMP         | Deoxyadenosine monophosphate            | YMDB00451 | HMDB0000905 | 653-63-4   |
|                        | dADP         | Deoxyadenosine diphosphate              | YMDB00901 | HMDB0001508 | 2793-06-8  |
|                        | dATP         | Deoxyadenosine triphosphate             | YMDB00700 | HMDB0001532 | 1927-31-7  |
|                        | dGTP         | Deoxyguanosine triphosphate             | YMDB00744 | HMDB0001440 | 2564-35-4  |
|                        | dCTP         | Deoxycytosine triphosphate              | YMDB00658 | HMDB0000998 | 2056-98-6  |
|                        | dUMP         | Deoxyuridine monophosphate              | YMDB00221 | HMDB0001409 | 964-26-1   |
|                        | dTMP         | Deoxythymidine monophosphate            | YMDB00162 | HMDB0001227 | 365-07-1   |
|                        | dTDP         | Deoxythymidine diphosphate              | YMDB00205 | HMDB0001274 | 491-97-4   |
|                        | dTTP         | Deoxythymidine triphosphate             | YMDB00745 | HMDB0001342 | 365-08-2   |
| Amino acids            | Ala          | Alanine                                 | YMDB00154 | HMDB0000161 | 56-41-7    |
|                        | Arg          | Arginine                                | YMDB00592 | HMDB0000517 | 74-79-3    |
|                        | Asn          | Asparagine                              | YMDB00226 | HMDB0000168 | 70-47-3    |
|                        | Asp          | Aspartic acid                           | YMDB00896 | HMDB0000191 | 56-84-8    |
|                        | Cys          | Cysteine                                | YMDB00046 | HMDB0000574 | 52-90-4    |
|                        | Gln          | Glutamine                               | YMDB00002 | HMDB0000641 | 56-85-9    |
|                        | Glu          | Glutamic acid                           | YMDB00271 | HMDB0000148 | 56-86-0    |
|                        | Gly          | Glycine                                 | YMDB00016 | HMDB0000123 | 56-40-6    |
|                        | His          | Histidine                               | YMDB00369 | HMDB0000177 | 71-00-1    |
|                        | Ile          | Isoleucine                              | YMDB00038 | HMDB0000172 | 73-32-5    |
|                        | Leu          | Leucine                                 | YMDB00387 | HMDB0000687 | 61-90-5    |
|                        | Lys          | Lysine                                  | YMDB00330 | HMDB0000182 | 56-87-1    |
|                        | Met          | Methionine                              | YMDB00318 | HMDB0000696 | 63-68-3    |
|                        | Phe          | Phenylalanine                           | YMDB00304 | HMDB0000159 | 63-91-2    |
|                        | Pro          | Proline                                 | YMDB00378 | HMDB0000162 | 147-85-3   |
|                        | Ser          | Serine                                  | YMDB00112 | HMDB0000187 | 56-45-1    |
|                        | Thr          | Threonine                               | YMDB00214 | HMDB0000167 | 72-19-5    |
|                        | Trp          | Tryptophan                              | YMDB00126 | HMDB0000929 | 73-22-3    |
|                        | Tyr          | Tyrosine                                | YMDB00364 | HMDB0000158 | 60-18-4    |
|                        | Val          | Valine                                  | YMDB00152 | HMDB0000883 | 72-18-4    |
