# Supplementary material for: Absolute Quantification of the Central Carbon Metabolome in Eight Commonly Applied Prokaryotic and Eukaryotic Model Systems
Source: MDPI journal article supplement (doi:10.3390/metabo10020074), 2020-02-19
Supplement: s1 [file s1]

**Table S5 *Escherichia coli* sampling parameters:** Sampling methods and parameters tested for sampling *E.coli* , listed with resulting energy charge (EC) ± standard deviation (SD) for cultures in rich and mineral medium

| Method              | Sampling parameters                                                                                                                |                       |                                           |                            |                         | Average EC ± SD |                |
|---------------------|------------------------------------------------------------------------------------------------------------------------------------|-----------------------|-------------------------------------------|----------------------------|-------------------------|-----------------|----------------|
|                     | Filter                                                                                                                             | Filter pore size (µm) | Vacuum preassure<br>(Below ambient, mbar) | Sampling OD <sub>600</sub> | Sampling volume<br>(mL) | Rich medium     | Mineral medium |
| Filtering           | Whatman glass microfiber filter GF/C™ (1822-047, GE Healthcare) stacked on Supor hydrophilic polyethersulfone filter (60110, Pall) | 1.2, 0.8              | 350-500                                   | 1                          | 10                      | 0.43 ± 0.10     | 0.52 ±0.11     |
|                     | Supor hydrophilic polyethersulfone filter (60110, Pall)                                                                            | 0.8                   | 200                                       | 1                          | 2 x 5*                  | 0.61 ± 0.04     | 0.61 ±0.21     |
| Cold centrifugation | Time<br>(min)                                                                                                                      | Temperature<br>(°C)   | Centrifugal force<br>(x g)                | Sampling OD <sub>600</sub> | Sampling volume<br>(mL) |                 |                |
|                     | 2 x 5**                                                                                                                            | 4                     | 4500                                      | 1                          | 10                      | 0.34 ± 0.14     | 0.45 ±0.16     |

\* 2 filters, 5 ml/filter to decrease biomass/filter. Filters were consequitively sampled and pooled into one extract

\*\* Pellets were re-suspended in cold MQ-H<sub>2</sub>O between centrifugation steps
