# Supplementary material for: Absolute Quantification of the Central Carbon Metabolome in Eight Commonly Applied Prokaryotic and Eukaryotic Model Systems
Source: Metabolites. 2020 Feb 19;10(2):74. doi: 10.3390/metabo10020074 (PMC7073941; doi:10.3390/metabo10020074)
Supplement: Supplementary file 1 [file metabolites-10-00074-s001.zip]

Archive with 7 entries (7 files):
- TableS6 Rost et al Feb2020.pdf
- Figure S1 Rost at al Feb2020.pdf
- TableS1 Rost et al Jan2020.pdf
- TableS2 Rost et al Jan2020.pdf
- TableS3 Rost et al Jan2020.pdf
- TableS4 Rost et al Feb2020.pdf
- TableS5 Rost et al Feb2020.pdf
